# Supplementary material for: Impact of inducible nitric oxide synthase (iNOS) expression on triple negative breast cancer outcome and activation of EGFR and ERK signaling pathways
Source: PubMed Central journal article supplement (PMC5655221; doi:10.18632/oncotarget.19631), 2017-07-26
Supplement: oncotarget-08-80568-s001.pdf [file oncotarget-08-80568-s001.pdf]

# Impact of inducible nitric oxide synthase (iNOS) expression on triple negative breast cancer outcome and activation of EGFR and ERK signaling pathways

## SUPPLEMENTARY MATERIALS

**A**

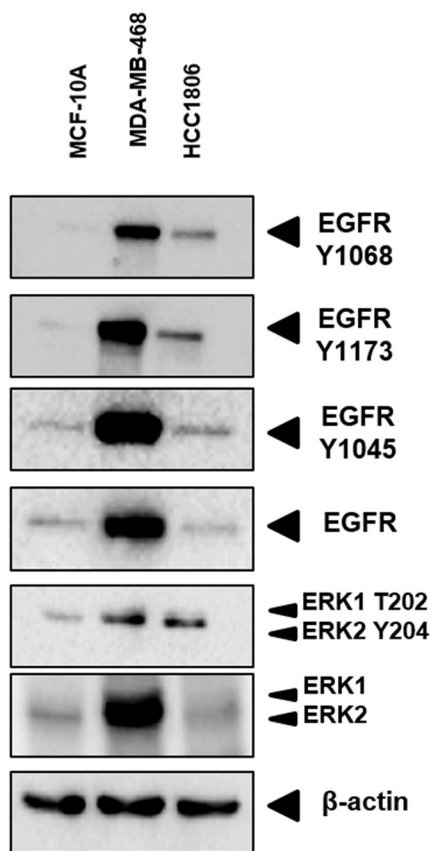

**B**

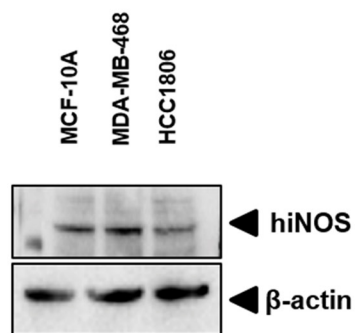

**C**

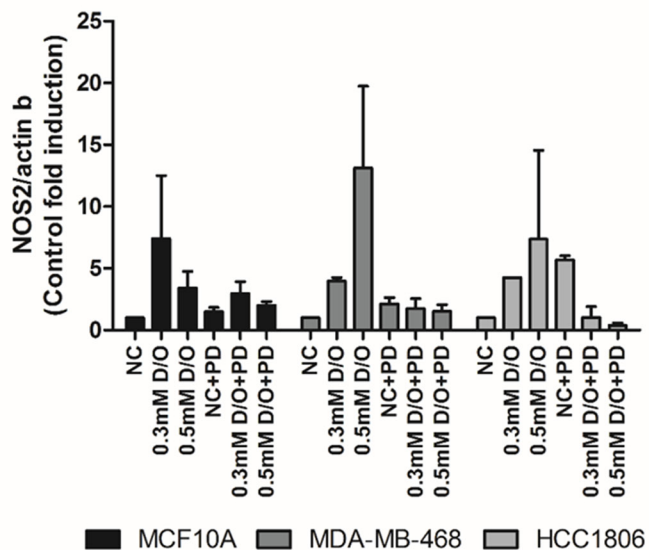

**Supplementary Figure 1:** Basal expression levels of (A) phospho-EGFR and phospho ERK and (B) iNOS in MCF-10A, MDA-MB-468 and HCC1806 cells. (C) Impact of DETA/NO +/- EGFR inhibition on iNOS mRNA expression in MCF-10A, MDA-MB-468 and HCC1806 cells.
